# Supplementary material
Source: publisher site journal article supplement (https://www.dovepress.com/article/546793)

Supplementary Figure 1. The flowchart of study design.

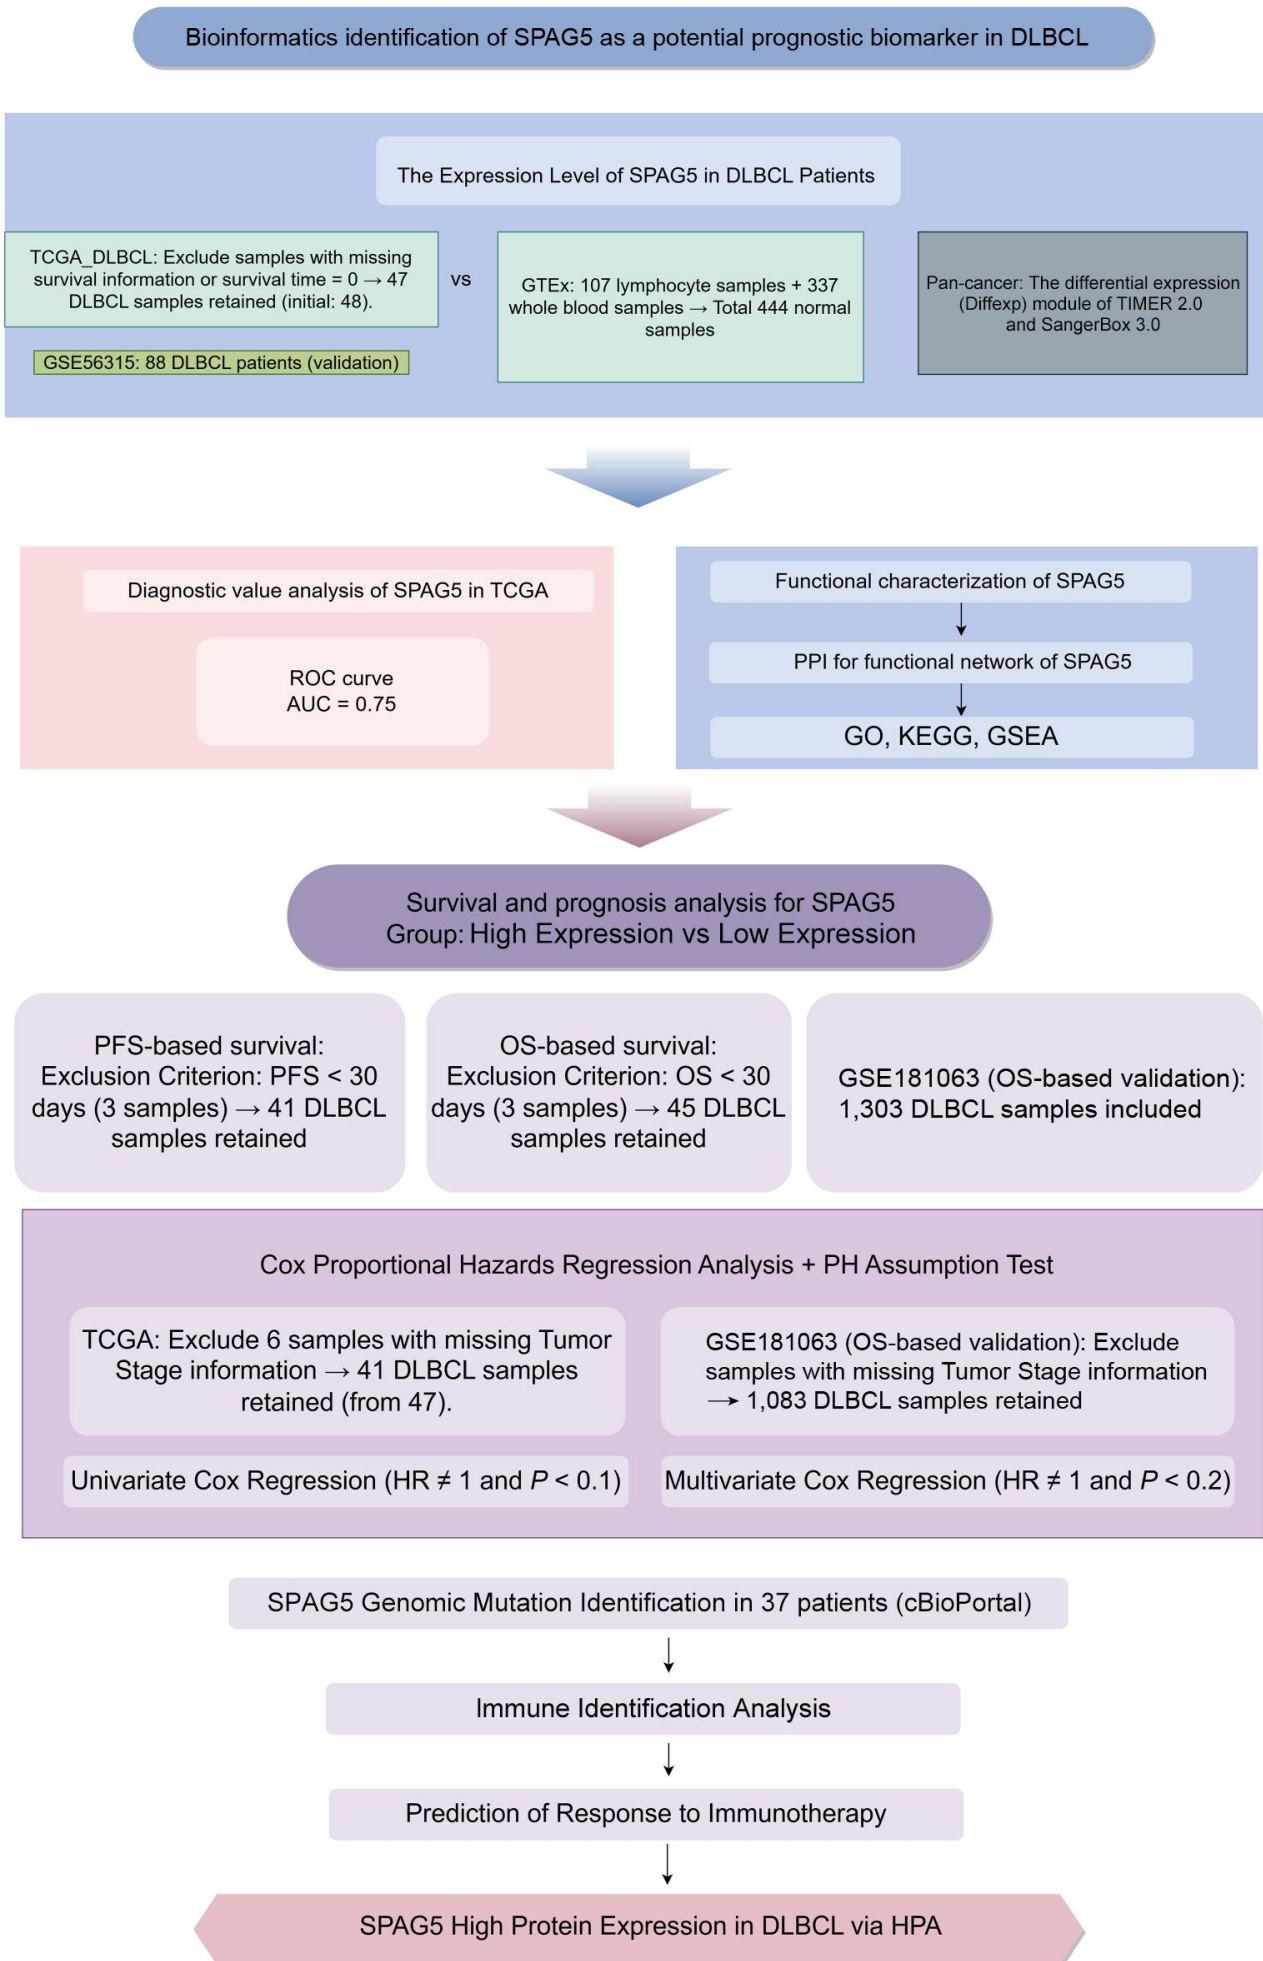

Supplementary Figure 2. Expression of *SPAG5* in different clinical features of patients with DLBCL. ns:  $P > 0.05$ .

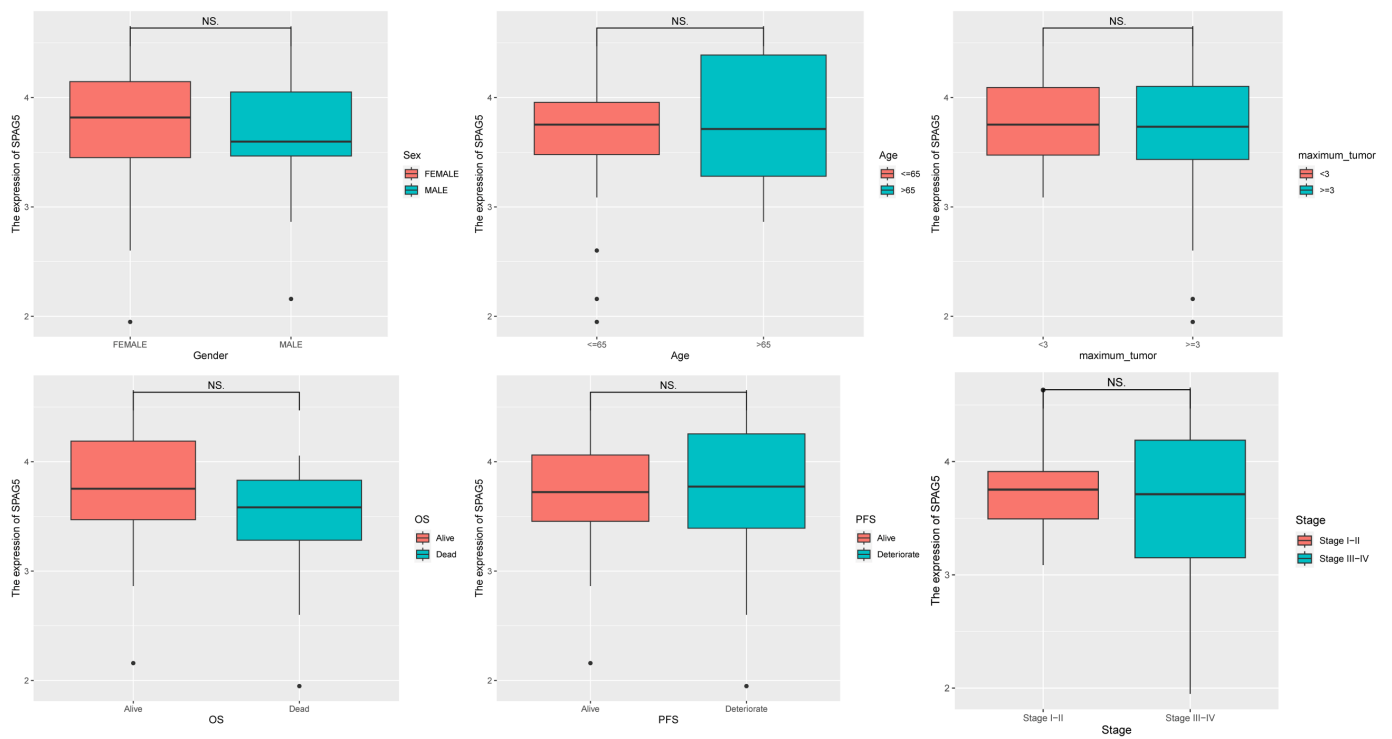

Supplementary Figure 3. Scatter diagram of correlation between *SPAG5* and other immune cells ( $P > 0.05$ ).

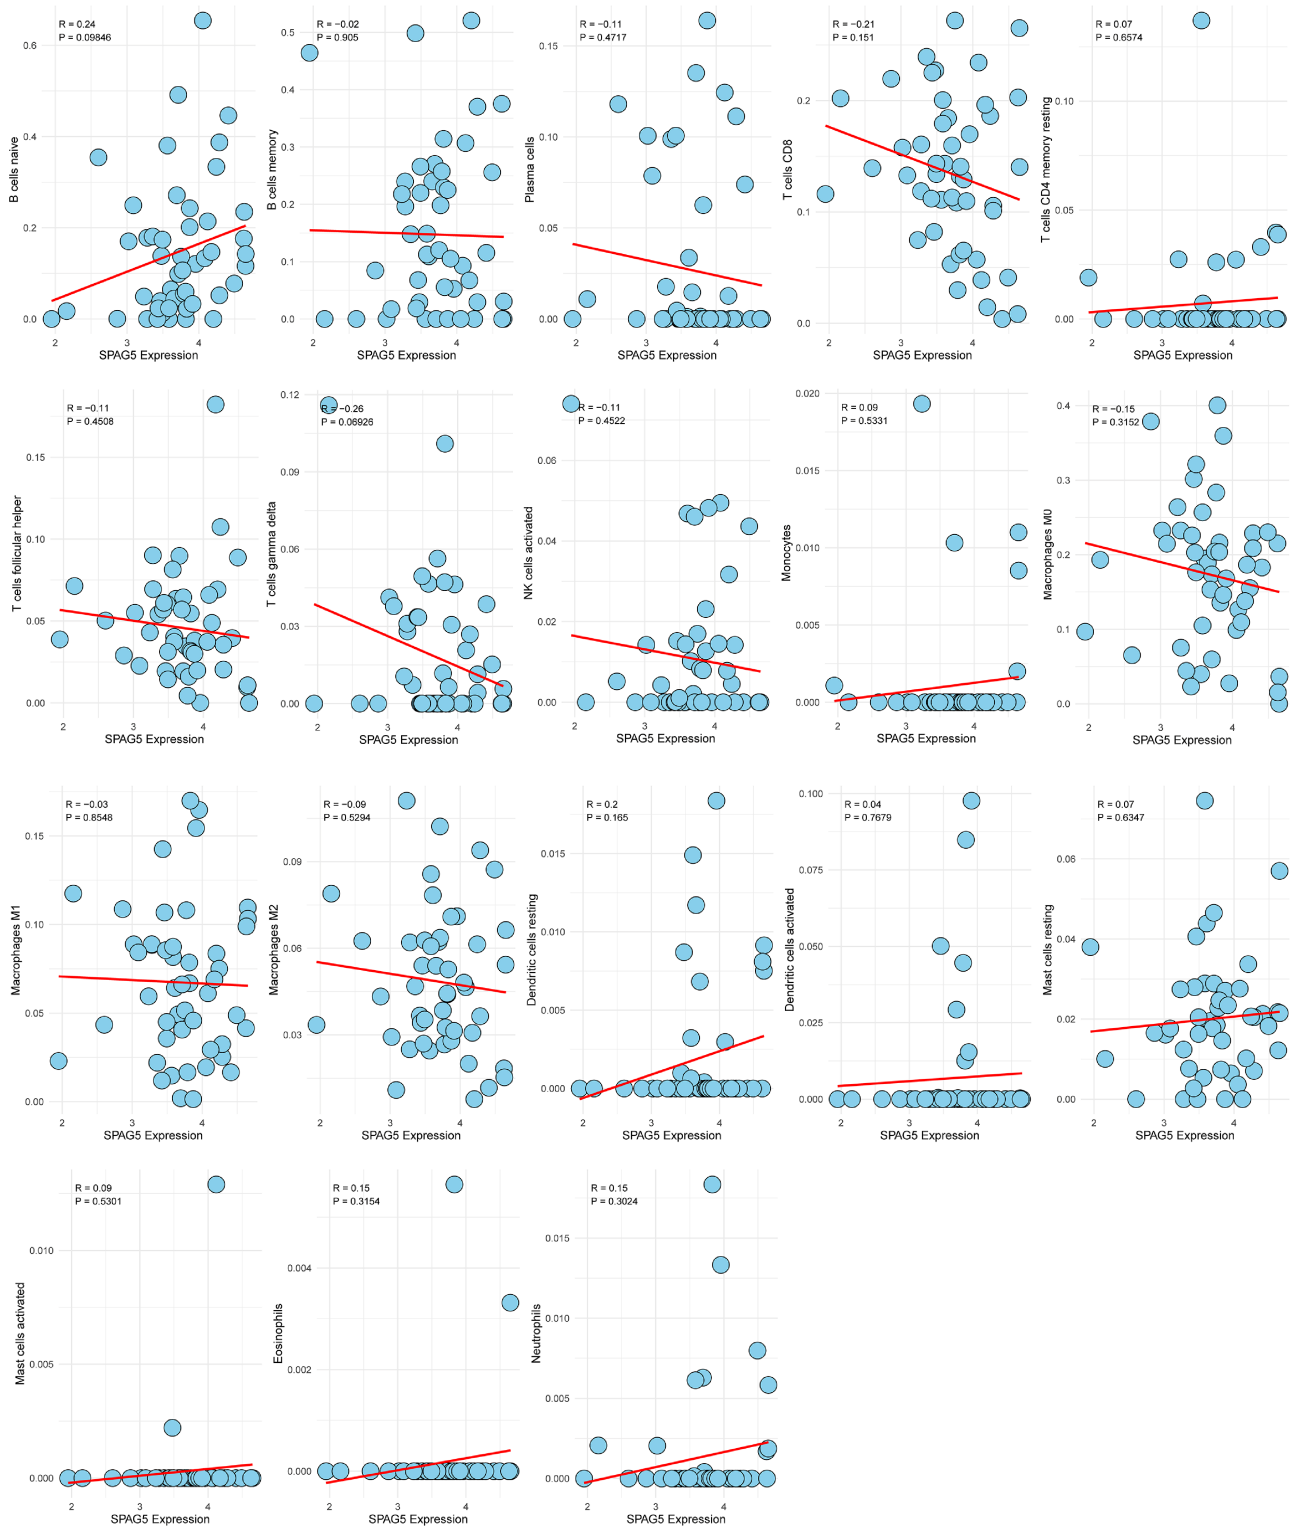

Supplement: Supplementary file 1 [file 546793%20Supplementary%20Material.pdf]
